# Supplementary material for: Targeting FAK/PYK2 with SJP1602 for Anti-Tumor Activity in Triple-Negative Breast Cancer
Source: MDPI journal article supplement (doi:10.3390/cimb45090446), 2023-08-24
Supplement: s1 [file s1]

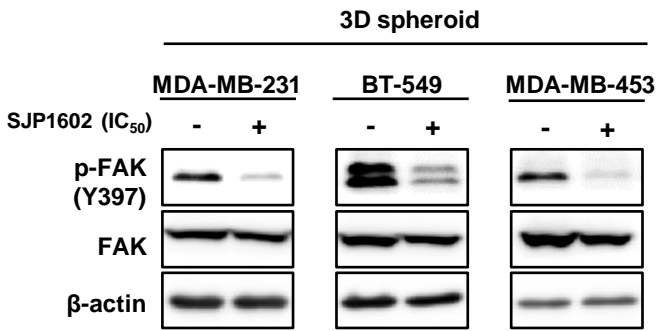

**Supplementary Figure S1. Effect of SJP1602 on TNBC Cells.** TNBC cells were treated with SJP1602 at concentrations equivalent to the IC<sub>50</sub> for pFAK. Western blot analysis was utilized to assess the expression and phosphorylation of FAK proteins.

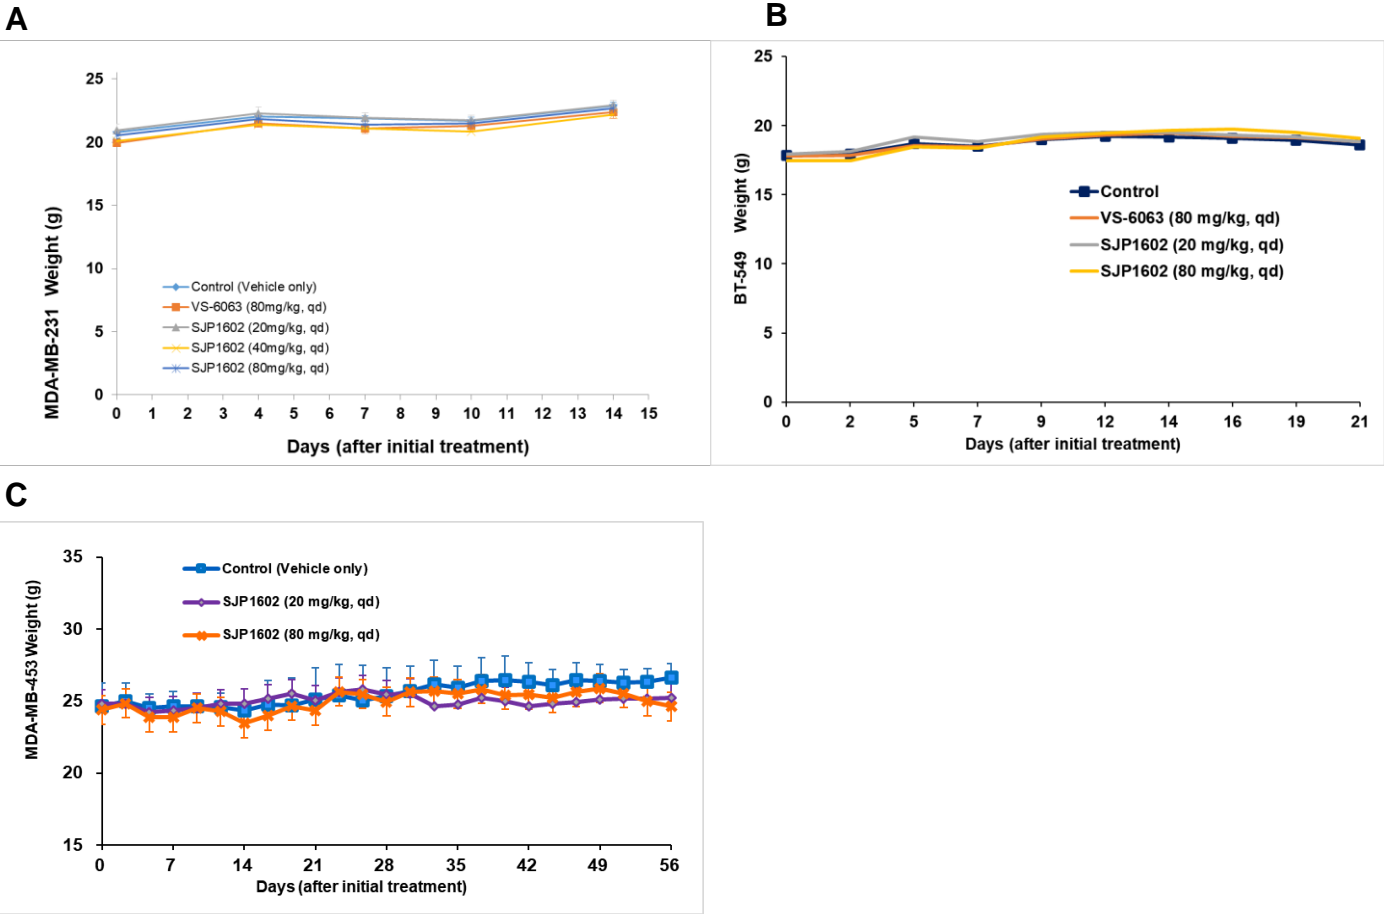

**Supplementary Figure S2. Changes in Body Weight of TNBC Xenograft Mouse Models Following Treatment with SJP1602.** Changes in mouse body weights during experiment. (A) MDA-MB-231, (B) BT-549, and (C) MDA-MB-453.

|                                    | VS-6063<br>@ 1 μM | GSK-2256098<br>@ 1 μM | SJP1602<br>@ 1 μM |
|------------------------------------|-------------------|-----------------------|-------------------|
| FAK(h)                             | -6                | -1                    | 3                 |
| Pyk2(h)                            | 6                 | 60                    | 4                 |
| Met(h)                             | 42                | 76                    | 21                |
| ALK(h)                             | 96                | 73                    | 28                |
| Aurora-A(h)                        | 12                | 43                    | 48                |
| CHK2(h)                            | 71                | 59                    | 51                |
| Fes(h)                             | 7                 | 49                    | 54                |
| Mer(h)                             | 7                 | 97                    | 60                |
| IR(h), activated                   | 30                | 76                    | 61                |
| CHK1(h)                            | 58                | 85                    | 62                |
| Lck(h)                             | 30                | 110                   | 63                |
| Fer(h)                             | 31                | 105                   | 68                |
| MELK(h)                            | 9                 | 91                    | 74                |
| Ron(h)                             | 72                | 91                    | 75                |
| Abl(h)                             | 57                | 99                    | 76                |
| Flt3(h)                            | 6                 | 108                   | 77                |
| CSK(h)                             | 88                | 92                    | 83                |
| Bmx(h)                             | 47                | 105                   | 84                |
| CDK5/p35(h)                        | 10                | 94                    | 84                |
| Yes(h)                             | 56                | 99                    | 84                |
| Blk(h)                             | 62                | 117                   | 85                |
| CDK2/cyclinA(h)                    | 28                | 94                    | 85                |
| Fms(h)                             | 67                | 88                    | 85                |
| PAK4(h)                            | 42                | 93                    | 85                |
| PI3 Kinase (p120g)(h)              | 104               | 101                   | 85                |
| FGFR3(h)                           | 44                | 91                    | 86                |
| Flt3(D835Y)(h)                     | 7                 | 76                    | 87                |
| Pim-1(h)                           | 86                | 87                    | 87                |
| CDK1/cyclinB(h)                    | 14                | 97                    | 88                |
| CK1γ3(h)                           | 84                | 95                    | 88                |
| EGFR(T790M,L858R)(h)               | 65                | 88                    | 88                |
| ARK5(h)                            | 21                | 92                    | 90                |
| c-RAF(h)                           | 80                | 72                    | 90                |
| FGFR2(h)                           | 46                | 98                    | 90                |
| PI3 Kinase (p110d/p85a)(h)         | 88                | 115                   | 91                |
| B-Raf(h)                           | 83                | 99                    | 93                |
| EphB4(h)                           | 67                | 94                    | 93                |
| PKCι(h)                            | 100               | 106                   | 93                |
| PKCθ(h)                            | 63                | 96                    | 93                |
| MAPK2(h)                           | 87                | 94                    | 95                |
| MST3(h)                            | 33                | 102                   | 95                |
| NIM1(h)                            | 78                | 85                    | 95                |
| PKCη(h)                            | 104               | 97                    | 95                |
| LKB1(h)                            | 89                | 98                    | 96                |
| cKit(h)                            | 80                | 93                    | 97                |
| DYRK2(h)                           | 80                | 52                    | 97                |
| PDGFRα(h)                          | 79                | 101                   | 97                |
| ATR/ATRIP(h)                       | 92                | 101                   | 97                |
| PI3 Kinase (p110a(H1047R)/p85a)(h) | 101               | 97                    | 97                |
| DCAMKL3(h)                         | 42                | 98                    | 98                |
| MEK1(h)                            | 93                | 101                   | 98                |
| ATM(h)                             | 63                | 94                    | 98                |
| DNA-PK(h)                          | 85                | 98                    | 98                |
| PI3 Kinase (p110a(E545K)/p85a)(h)  | 100               | 93                    | 98                |

|                                   | VS-6063<br>@ 1 $\mu$ M | GSK-2256098<br>@ 1 $\mu$ M | SJP1602<br>@ 1 $\mu$ M |
|-----------------------------------|------------------------|----------------------------|------------------------|
| cSRC(h)                           | 72                     | 88                         | 99                     |
| ErbB4(h)                          | 104                    | 81                         | 99                     |
| HIPK2(h)                          | 16                     | 94                         | 100                    |
| HIPK3(h)                          | 54                     | 106                        | 100                    |
| PKB $\alpha$ (h)                  | 101                    | 105                        | 100                    |
| PKC $\alpha$ (h)                  | 92                     | 95                         | 100                    |
| ZIPK(h)                           | 97                     | 93                         | 100                    |
| PI3 Kinase (p110b/p85a)(h)        | 103                    | 105                        | 100                    |
| CK1 $\gamma$ 2(h)                 | 64                     | 97                         | 101                    |
| KDR(h)                            | 28                     | 88                         | 101                    |
| ROCK-I(h)                         | 103                    | 107                        | 101                    |
| Wee1(h)                           | 72                     | 88                         | 101                    |
| PI3 Kinase (p110a(E542K)/p85a)(h) | 104                    | 97                         | 101                    |
| DDR2(h)                           | 94                     | 138                        | 102                    |
| FGFR4(h)                          | 104                    | 104                        | 102                    |
| PDK1(h)                           | 66                     | 117                        | 102                    |
| EphA7(h)                          | 41                     | 99                         | 103                    |
| IKK $\epsilon$ (h)                | 88                     | 102                        | 103                    |
| IR(h)                             | 62                     | 105                        | 103                    |
| PKC $\epsilon$ (h)                | 98                     | 112                        | 103                    |
| Flt4(h)                           | -3                     | 67                         | 104                    |
| Ros(h)                            | 106                    | 103                        | 104                    |
| PI3 Kinase (p110a/p85a)(h)        | 103                    | 83                         | 104                    |
| Axl(h)                            | 57                     | 84                         | 105                    |
| B-Raf(V599E)(h)                   | 89                     | 67                         | 105                    |
| CK1 $\gamma$ 1(h)                 | 81                     | 99                         | 105                    |
| EphA2(h)                          | 91                     | 92                         | 105                    |
| Hck(h)                            | 99                     | 100                        | 105                    |
| IGF-1R(h), activated              | 74                     | 108                        | 105                    |
| Snk(h)                            | 64                     | 113                        | 105                    |
| Tie2 (h)                          | 82                     | 108                        | 105                    |
| Abl(T315I)(h)                     | 44                     | 92                         | 106                    |
| Flt1(h)                           | 21                     | 94                         | 106                    |
| Lck(h) activated                  | 58                     | 90                         | 107                    |
| DAPK1(h)                          | 94                     | 83                         | 108                    |
| BRK(h)                            | 91                     | 67                         | 109                    |
| TrkA(h)                           | 2                      | 103                        | 109                    |
| FGFR1(h)                          | 43                     | 109                        | 111                    |
| Ret(h)                            | 39                     | 117                        | 111                    |
| EGFR(h)                           | 105                    | 98                         | 112                    |
| ErbB2(h)                          | 122                    | 94                         | 113                    |
| PKC $\mu$ (h)                     | 100                    | 109                        | 113                    |
| TAK1(h)                           | 71                     | 95                         | 113                    |
| IGF-1R(h)                         | 55                     | 115                        | 116                    |
| PKD2(h)                           | 116                    | 90                         | 116                    |
| EGFR(T790M)(h)                    | 82                     | 106                        | 119                    |
| PAK1(h)                           | 79                     | 91                         | 119                    |
| EGFR(L861Q)(h)                    | 128                    | 69                         | 120                    |
| TrkC(h)                           | 13                     | 104                        | 120                    |
| cKit(D816H)(h)                    | 94                     | 98                         | 124                    |
| p70S6K(h)                         | 98                     | 69                         | 124                    |
| ZAP-70(h)                         | 139                    | 105                        | 124                    |
| IKK $\alpha$ (h)                  | 125                    | 93                         | 130                    |
| EGFR(L858R)(h)                    | 134                    | 33                         | 133                    |
| cKit(V560G)(h)                    | 74                     | 104                        | 136                    |
| PDGFR $\alpha$ (D842V)(h)         | 87                     | 119                        | 141                    |

**Supplementary Table S1. Kinase Assays for SJP1602.** The data show the residual kinase activity after treatment with 1  $\mu$ M of SJP1602.

| Compound | Cytotoxicity on Normal Cell Lines (IC50, nM) |         |       |       |         |
|----------|----------------------------------------------|---------|-------|-------|---------|
|          | CCD-18Co                                     | WI38    | Fa2N4 | FDF   | HEK293T |
| SJP1602  |                                              |         |       |       |         |
| >10,000  |                                              | >10,000 | 7,276 | 9,616 | >10,000 |

Supplementary Table S2. Cytotoxicity Evaluation of SJP1602 on Normal Cell Lines.
